# Supplementary material for: Bifunctional Al Doped Cobalt Ferrocyanide Nanocube Array for Energy-Saving Hydrogen Production via Urea Electrolysis
Source: Preprints.org preprint supplement (doi:10.20944/preprints202309.0631.v1), 2023-09-11
Supplement: Supplementary file 1 [file supplementary]

Supplementary information for

**Bifunctional Al doped** **Cobalt Ferrocyanide Nanocube Array for Energy-saving Hydrogen Production via Urea Electrolysis**

## Xiafei Gao#, Mengyue Gao#, Xueping Yu, Xiaoyong Jin, Gang Ni, Juan Peng*

College of Chemistry and Chemical Engineering, State Key Laboratory of High-efficiency Utilization of Coal and Green Chemical Engineering, Ningxia University, Yinchuan 750021, P. R. China.

1. mail address: pengjuan@nxu.edu.cn (J. Peng)

#The authors contribute equally to this work.

Fig. S1 XRD patterns of NF, Co2Fe(CN)6/NF and Al-Co2Fe(CN)6/NF

Fig. S2 SEM images of Al-Co2Fe(CN)6/NF

Fig. S3 (a) The polarization curves of UOR of Al-Co2Fe(CN)6/NF at different stirring times;  (b) The polarization curves of Al-Co2Fe(CN)6/NF with different Co2+ concentration;  (c) The polarization curves of UOR of Al-Co2Fe(CN)6/NF with different Al3+ concentrations;  (d) The polarization curves of UOR of Co2Fe(CN)6/NF

doped with different metals

Fig.S4 (a) The polarization curves of HER of Al-Co2Fe(CN)6/NF at different stirring times;  (b) The polarization curves of HER of Al-Co2Fe(CN)6/NF with different Co2+ concentration;  (c) The polarization curves of HER of Al-Co2Fe(CN)6/NF with different Al3+ concentrations;  (d) The polarization curves of HER of Co2Fe(CN)6/NF doped with different metals

Fig.S5 (a) Polarization curves of UOR of Al-Co2Fe(CN)6/NF in electrolyte solutions under different conditions  (b) The polarization curves of HER of Al-Co2Fe(CN)6/NF in electrolyte solutions under different conditions

Fig.S6 Cyclic voltammetry curves obtained at a sweep rate of 10-110 mV/s: (a) Al-Co2Fe(CN)6/NF; (b) Co2Fe(CN)6/NF; (c) NF; (d) Linear fitting of the capacitive current densities Δ*j* against the CV scan rates

**Supplementary Table 1.** Comparison of the catalytic performances of different UOR electrocatalysts
